# Supplementary material for: Effect of Diosmin Administration in Patients with Chronic Venous Disorders on Selected Factors Affecting Angiogenesis
Source: PubMed Central journal article supplement (PMC6767141; doi:10.3390/molecules24183316), 2019-09-12
Supplement: molecules-24-03316-s001.pdf [file molecules-24-03316-s001.pdf]

# Supplementary

## Effect of diosmin administration in patients with chronic venous disorders on selected factors affecting angiogenesis

Marcin Feldo<sup>1,\*</sup>, Magdalena Wójciak-Kosior<sup>2</sup>, Ireneusz Sowa<sup>2</sup>, Janusz Kocki<sup>3</sup>, Jacek Bogucki<sup>3</sup>, Tomasz Zubilewicz<sup>1</sup>, Jan Kęsik<sup>1</sup>, Anna Bogucka-Kocka<sup>4</sup>

<sup>1</sup> Department of Vascular Surgery and Angiology, Medical University of Lublin, Staszica 11, 20-081 Lublin, Poland; martinf@interia.pl (M.F.), tomasz.zubilewicz@umlub.pl (T.Z.), jankesik@umlub.pl (J.K.)

<sup>2</sup> Department of Analytical Chemistry, Medical University of Lublin, Chodźki 4a, 20-093 Lublin, Poland; kosiorma@wp.pl (M.W.K); i.sowa@umlub.pl (I.S)

<sup>3</sup> Department of Clinical Genetics, Medical University of Lublin, Lublin, Poland, Radziwiłłowska 11, 20-080 Lublin; janusz.kocki@umlub.pl (J.K.); jacekbogucki@wp.pl (J.B.)

<sup>4</sup> Chair and Department of Biology and Genetics, Medical University of Lublin, W. Chodźki 4A, 20-093 Lublin, Poland, [anna.bogucka-kocka@umlub.pl](mailto:anna.bogucka-kocka@umlub.pl)

\* Correspondence: martinf@interia.pl; Tel.: +48 81532 5707

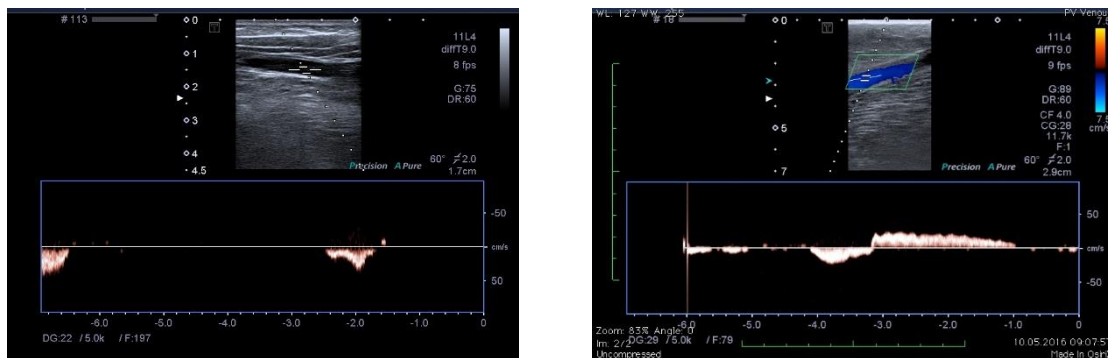

(a)

(b)

Figure S1. Echo-Doppler assay obtained in patients without (a) and with (b) blood reflux.

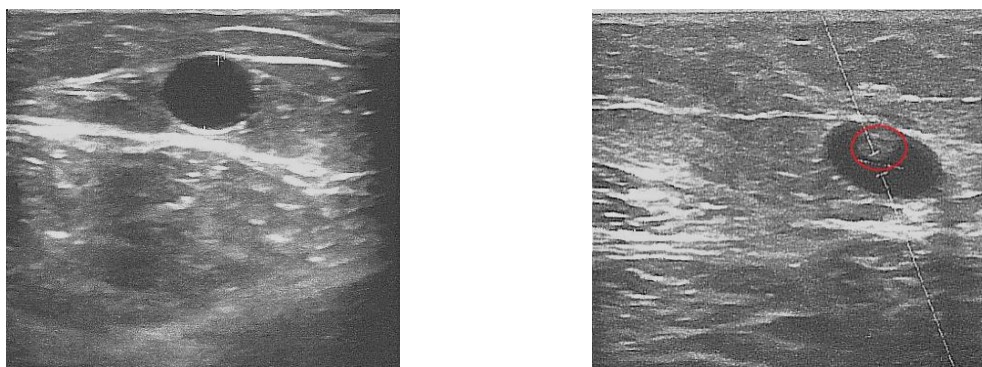

(a)

(b)

Figure S2. Ultrasound images of patients' veins without (a) and with thrombosis marked in red (b).
